# Automated Processing and Statistical Analysis of NMR spectra obtained from *Arabidopsis thaliana* Extracts

Valtteri Mäkelä<sup>a,\*</sup>, Lauri Vaahtera<sup>b</sup>, Jussi Helminen<sup>a</sup>, Harri Koskela<sup>c</sup>, Mikael Brosché<sup>b</sup>, Ilkka Kilpeläinen<sup>a</sup>, Sami Heikkinen<sup>a</sup>

<sup>a</sup>Laboratory of Organic Chemistry, Department of Chemistry, University of Helsinki, P.O. Box 55, FI-00014 University of Helsinki, Finland

<sup>b</sup>Department of Biosciences, University of Helsinki, P.O. Box 65, FI-00014 Helsinki, Finland

<sup>c</sup>VERIFIN, Finnish Institute for Verification of the Chemical Weapons Convention, Department of Chemistry, P.O. Box 55, FI-00014 University of Helsinki, Finland

---

## Abstract

To cope with vast amounts of data produced by metabolomic and mixture analysis using NMR, the employed analysis techniques and tools are very important. In this paper, we demonstrate quantitative <sup>1</sup>H and 2D-JRES NMR analysis of *Arabidopsis thaliana* extracts utilizing our ImatraNMR and SimpeleNMR software to automate the processing the spectra, extracting data, and perform statistical analysis of the results. Metabolomes of four different strains of *Arabidopsis thaliana* are analyzed under control conditions and during acute ozone exposure. Key differences are identified between accessions Col-0 and Cvi-0 (epithionitriles, iberin nitrile) and ozone damage associated metabolite(s) can be identified. Sample stability is also addressed.

**Keywords:** Quantitative NMR, qNMR, automated processing, *Arabidopsis thaliana*, metabolomics

---

## 1. Introduction

Quantitative techniques and mixture analysis with NMR are becoming increasingly common, while high-field NMR instruments, cryoprobes and autosamplers are available to more researchers. Metabolite analysis, reaction monitoring/following or other mixture analysis can produce vast amounts of complex spectra, which are difficult to analyze with traditional NMR processing software, as they are designed from the viewpoint of small-molecule analysis. To accommodate these needs, features aimed for mixture analysis and automation have been incorporated into commercial processing software (Agilent/Varian CRAFT [1], Mnova GSD and qNMR [2], Bruker Biospin AMIX and IconNMR). The rising popularity of utilizing NMR for metabolomics has also spawned many commercial and free tools suited for different stages and aspects of metabolite analysis: NMR Suite

---

\*Corresponding author

Email address: [valtteri.makela@iki.fi](mailto:valtteri.makela@iki.fi) (Valtteri Mäkelä)

(Chenomx Inc. [3, 4]), rNMR [5], BATMAN [6, 7], Pathomx [8] and others [9, 10], with publicly available databases [11, 12] and even web-applications available [13, 14].

Even with these developments, the workflow for processing and analyzing hundreds of spectra can be a complex, and purpose-built tools might be suitable only for certain type of analysis, be vendor specific or expensive. More general purpose raw processing tools such as NMRPipe [15] and NMRGlue [16] can be used in many tasks, but require scripting or programming knowledge from the user. To address some aforementioned limitations, we created simple, free, and multi-vendor processing/analysis software Ima-  
traNMR and SimpeleNMR. These tools are more generic and suitable for automation than traditional processing programs, but are still somewhat simpler to use than raw processing tools and provide data-analysis capabilities. While originally developed for automated hydrocarbon analysis[17], in this paper we use updated versions of these tools and demonstrate metabolite analysis of *Arabidopsis thaliana* extracts, and discuss various difficulties and techniques associated with this type of analysis.

### 1.1. Sensitivity and overlap

Metabolite analysis and mixture analysis in general using NMR has two main obstacles: sensitivity and signal overlap. The most sensitive basic technique, 1D  $^1\text{H}$  NMR, is simple to acquire and quite easily quantitative, but suffers from low chemical shift dispersion and signal splitting due J-coupling. Multidimensional NMR techniques such as 2D HSQC provide significant boost in resolving power, but come with the cost of reduced sensitivity and/or increased acquisition time. Multipulse experiments are also more complex and depend on a large number of phenomena, including usually magnetization transfer, rendering most experiments non-quantitative without careful preparation and/or redesign of the experiment.

If sample concentration is high enough (such as in hydrocarbon analysis), even quantitative 1D  $^{13}\text{C}$  NMR can be used, as it is simple to acquire and provides much greater chemical shift dispersion [17]. While usually not accessible, it can be viable even in metabolomic context if hyperpolarization can be utilized [18]. Essentially limitations in resolving power can be generally transformed to limitations in sensitivity, providing that the spectrometer at hand can implement modern NMR techniques.

The resolving power of  $^1\text{H}$  spectra can also be improved by eliminating homonuclear  $^1\text{H}$ - $^1\text{H}$  couplings, rendering all signals to singlets. This is not trivially done, but several modern techniques such as those based on Zangger-Sterk element are capable of creating homonuclearly decoupled or *pure shift*  $^1\text{H}$  spectrum [19, 20], details of which can be found in recent review by Zangger [21]. Unfortunately most techniques suffer from prohibitive sensitivity penalty of retaining only few percents of the signal, making them difficult to utilize in metabolic analysis. The classic J-resolved spectra (2D-JRES)[22] processed appropriately can also yield essentially decoupled spectra with less signal loss, while quantitativity is sacrificed by the use of sine-bell type apodization along absolute value processing to avoid dispersive line shape. There are techniques which can be used to circumvent this, such as advanced time-domain processing [23, 24, 25, 26, 27] and the use of Zangger-Sterk element [28], but they greatly increase the complexity of the processing, or again suffer from significant sensitivity penalty.

55 *1.2. Quantitative NMR*

Traditionally, quantitative NMR means that all signal intensities are directly proportional to concentration, and the absolute concentration can be easily derived from known concentration of internal/external standard. These quantitative conditions are easily achievable on basic single pulse 1D spectra, and they are possible in some special-  
60 ized versions of more complex experiments such as the quantitative versions of INEPT [29, 30], DEPT/POMMIE [31, 32] and HSQC [33, 34, 35]. In other experiments, non-uniform factors affecting signal intensity makes straightforward comparison impossible and calibration curves and authentic standards are required, which can be difficult or infeasible.

65 This drawback doesn't render the experiments unsuitable for quantitative analysis as such, as the signal intensity can usually assumed to be linearly proportional to concentration when measuring all samples under identical conditions and field strength. So while all signals can't be directly compared to each other, signals originating from same compound can still be compared across numerous samples. This enables studying the  
70 relative concentration differences, which in many cases is enough, especially in metabolite analysis where the absolute concentration might anyway depend strongly on sample preparation or other factors.

*1.3. NMR processing and data extraction*

To produce meaningful data, the acquired FIDs must be processed and data extracted  
75 from the resulting spectra, preferably via automatic, consistent and robust process when large numbers of spectra are involved. Luckily, almost all of the processing parameters can be usually predetermined or devised easily from the experimental setup for a set of similar spectra, at least after looking at few representative samples. Notable exception is phase correction, which still is required to be performed manually in some cases. Most  
80 phase problems are related to delayed sampling, transient response of analog filters and errors in the first few data points, which can lead to significant baseline errors after phase correction [36, 37, 38]. Recent spectrometers with very high oversampling rates and DSP filtering (Agilent VNMRs/DD2 consoles) [39, 40, 41] and/or backward prediction of the first few data points (TopSpin digitizer mode "BASEOPT" [42, 43]) have diminished  
85 these problems and generally produce spectra with good baseline and low 1st order phase correction. Still, some error sources such as phase response of RF pulses can't be rectified with these measures, and a totally automatic and robust method suitable for every case seems to be difficult to devise. Subsequently, new methods have been developed even quite recently [44, 45]. Phasing can be also avoided with absolute value processing which  
90 renders phase meaningless, but this has severe drawbacks as discussed below.

After processing the signals must be quantified for analysis, which is easy for few well separated signals using numerical integration, but rapidly tedious when dealing with hundreds of spectra without proper automation. Overlapping signals can be separated with line shape fitting quite accurately, but automation is still limited and the technique  
95 is usually only employed in more targeted analysis, when the signals resulting from compounds of interest are known and can be fitted simultaneously [46, 4, 47, 6, 7]. Still, impressive automation can be achieved with tailored analysis tools for specific class of samples: for example fully automated analysis of blood plasma has been demonstrated utilizing advanced statistical methods such as Bayesian models, Markov Chain Monte  
100 Carlo (MCMC) and Sequential Monte Carlo (SMC) [48, 49, 13].

Other techniques like Agilent CRAFT [1] based on Bayesian fitting of signals directly to the FID data or Mnova GSD [2] can in principle decompose the spectrum into frequency-intensity pairs in full automation, but do not take into account or combine signals resulting from the same compound. This kind of data requires further refinement or filtering of the data in non-targeted analysis, and the real-world use of these techniques applied for complex mixtures seems to be limited.

If no particular compounds are targeted, the spectrum area is usually divided in equal integration areas, "bins", which are integrated and treated as variables describing the sample and analyzed with statistical software. In addition to traditional equidistant binning, several more sophisticated schemes have been developed [50, 51, 52], with the aim of more meaningful placement of the bin borders. In ImatraNMR, simple scheme based on classifying found signals can be used ("histogram binning").

#### 1.4. Metabolite analysis and JRES

While the 2D J-resolved spectroscopy (2D-JRES) as a technique is quite old [22], it is suitable for metabolomic analysis in many ways, as discussed in review article of Ludwig et al.[53]. JRES spectrum is processed in absolute value mode, so phasing is not required at all, making the automation of processing the spectrum straightforward and robust, even in the presence of broad signals or water suppression residual. The broadening caused by dispersive line shape is minimized by sine bell apodization, while shearing, symmetrization and projection post-processing neutralize the effect of  $^1\text{H}$ - $^1\text{H}$  couplings producing essentially "decoupled" spectra. The drawback of the sine window function is the strong weighting of signal intensity by  $T_2$  relaxation rate, which compromises absolute quantitativity. However this is not essential when comparing relative concentrations, and JRES has been established as routine tool in metabolite analysis. If needed, a calibration curve can be used producing accuracy and precision can be comparable to  $^1\text{H}$  NMR spectra [54].

The shear/rotate and symmetrization operations can produce some artifacts, however they seem to be a minor problem in practice: Parsons et al. have studied the quantification errors with real and simulated JRES spectra, and found that the post-processing causes less than 2% of errors in quantification [55]. Signals in close proximity can cause significant errors up to about 33%, but this error falls rapidly to under few percent with distance. Furthermore, in real-world application to metabolite analysis, the errors were comparable to those obtained by line shape fitting of  $^1\text{H}$  spectra [55].

Reducing the proton signals to singlets also simplifies analysis and integration: the spectrum will have smaller number signals, and if binning is used, the narrower signal footprint reduces the probability of a signal being spread into several bins. This can be expected work well in combination with non-equidistant binning schemes such as the "seek histogram" feature in ImatraNMR.

#### 1.5. SimpeleNMR and ImatraNMR analysis software

SimpeleNMR can perform the basic processing of the FID using discrete Fourier transform (DFT) to produce spectrum, along with the usual pre- and post-processing steps (apodization, baseline correction). ImatraNMR on the other hand is aimed for batch integration of NMR spectra, with some preprocessing functionality, and can read spectra in multiple formats as well. Both programs are freely available at <http://vltr.fi/imatranmr/>, and can be freely used for research and commercial purposes.

| Plant line | Description                                   |
|------------|-----------------------------------------------|
| Col-0      | Ozone tolerant natural accession              |
| Cvi-0      | Ozone sensitive natural accession             |
| Col-s      | Cvi-0's ozone sensitivity in Col-0 background |
| Cvi-t      | Col-0's ozone sensitivity in Cvi-0 background |

Table 1: The used plant lines.

| Series | Description              | Plant lines                |
|--------|--------------------------|----------------------------|
| 1A     | First growth period      | Col-0, Cvi-0, Col-s, Cvi-t |
| 1B     | Second growth            | Col-0, Cvi-0, Col-s, Cvi-t |
| 2      | Ozone stress             | Col-0, Cvi-0, Col-s        |
| 3      | Recombinant inbred lines | Col-0, Cvi-0 + 6 RILs      |

Table 2: The analyzed sample sets.

Recently, some new features have been added for both programs, making them more suitable for metabolite analysis. In SimpeleNMR, 2D-JRES processing has been implemented, with limited support for other magnitude mode 2D spectra. The usual post-processing techniques of 45° rotation/shear and symmetrization in F2 dimension are implemented as well, allowing fast batch processing into projected 1D spectra. Furthermore, more window functions, improvements in plotting/viewing, supported output formats and basic multivariate (PCA, PLS-DA) analysis based on Scikit-learn [56] have been included. In ImatraNMR, probabilistic quotient normalization by Dieterle et al. has been implemented [57], which can be used for normalization in complex biological samples, where the concentration of the samples is hard to determine. Most of these features are demonstrated in the analysis below.

## 2. Materials and methods

### 2.1. Plant lines

The analysis used 4 plant lines: Natural accessions Col-0 (ozone tolerant) and Cvi-0 (ozone sensitive), and near-isogenic lines Col-s and Cvi-t, where the ozone phenotype of the other natural accession was introgressed into the other. Additionally, 6 recombinant inbred lines (RIL) were analyzed. Of these, four different sample sets were measured. The features are described in Table 1, while the sample sets are described in Table 2.

Plants were grown on 1:1 peat:vermiculite mixture in controlled environment chambers (Weiss Bio 1300) with 12-h/12-h (day/night) cycle, temperature 22/19 °C, and relative humidity of 70/90 % until the age of three weeks. Plants were collected at 2 pm, after 7 hours of light. Ozone treatment was performed using two similar chambers, other containing 350 ppb ozone. Plants were transferred from the fresh air chamber to the ozone chamber 120 minutes, 60 minutes, 40 minutes, or 20 minutes before 2 pm. Then all samples were collected at 2 pm and flash frozen in liquid nitrogen.

### 2.2. Preparation of NMR samples

The plants were harvested and placed in liquid nitrogen, and ground into fine powder in a mortar cooled with liquid nitrogen. To remove water, the material was lyophilized

for 40 hours. For each sample, 25 mg of dried material were weighted and extracted  
175 with 1.0 ml of NMR solvent, consisting of 2:8 (vol.) mixture of MeOH-d<sub>4</sub> and D<sub>2</sub>O and  
containing 0.05% TSP-d<sub>4</sub> as internal standard. The sample was mixed by vortexing for  
30 seconds, heated to +50 °C for 10 minutes, vortexed 2\*10 s during the heating and 30  
s after the heating. Then sample was centrifuged at 30000 g for 5 minutes at +4 °C and  
180 the supernatant was added to standard 5 mm NMR tubes. The samples were kept on  
ice until measurement within a few hours. The preparation protocol was adopted from  
earlier work [58, 59].

### 2.3. NMR spectroscopy

All spectra were acquired at 27 °C on a Varian <sup>UNITY</sup>INOVA 600 MHz NMR spec-  
trometer using 5 mm triple resonance (<sup>1</sup>H, <sup>13</sup>C, <sup>15</sup>N) pulsed field gradient probehead.  
185 From every sample, a quantitative <sup>1</sup>H spectrum was measured using 45° excitation pulse,  
13.0 s relaxation delay and 2.0 s of acquisition time, based on maximum observed T<sub>1</sub>  
values of about 5 s. Initially, 512 transients were collected (sample series 1A), but for  
all subsequent samples 256 transients were used as the signal-to-noise ratio seemed suf-  
ficient, yielding total experiment time of 1 hour 4 minutes. Pulse length for 90° pulse  
190 was calibrated to be ~7.45 us, spectrum window was 7165 Hz (11.94 ppm), while the  
transmitter was centered at 4.18 ppm.

From sample set 2 (oxidative stress), 2D J-resolved (JRES) spectra were obtained  
using the same spectrum window and transmitter position, but with 5 s relaxation delay  
and 1 s acquisition time. In indirect dimension, 64 increments were collected, and for  
195 each increment, 8 transients were used, yielding total experiment time of 56 minutes.  
Additionally, HSQC, HMBC, TOCSY and COSY experiments were measured from select  
samples to aid in metabolite assignment.

To investigate sample stability, two samples were measured for extended periods of  
44 and 160 hours in 27 °C, acquiring <sup>1</sup>H spectrum for every ~15 minutes. The same  
200 parameters were used as in regular quantitative <sup>1</sup>H experiments, but only 64 transients  
were collected to achieve the shorter acquisition time.

### 2.4. NMR processing (SimpeleNMR)

All spectra were processed using SimpeleNMR. For regular <sup>1</sup>H spectra, FIDs were  
zerofilled doubling the number of data points, and apodized by exponential decay func-  
205 tion producing linear broadening of 0.5 Hz. After Fourier transform, automatic phasing  
(autophase mode 4) was applied, and 1st order baseline correction (drift correction) per-  
formed. For JRES, zerofill was performed identically, but a sine bell apodization was  
used matched to the length of the FID. As typical with JRES, 45 degrees rotation/shear  
and symmetrization in indirect dimension was performed, and both 2D and 1D versions  
210 (via skyline projection of the spectra) were produced. The exact configuration files used  
with SimpeleNMR can be found in supporting information.

### 2.5. Data extraction (ImatraNMR)

Further processing and extraction of integrals were carried out in ImatraNMR. The  
processing "recipes" are determined by ImatraNMR script files, which can be found in  
215 the supporting information to provide more details. First all spectra were referenced  
and normalized to the TSP-d<sub>4</sub> signal present, which was aligned to 0.0 ppm. Methanol

and water residual signals were removed from the spectrum using the nuke function, and signal seek was performed in the region of 0.5-9.0 ppm. From the results, "signal histogram" was generated combining similar signals, and the resulting integral areas integrated (histogram binning). In this method, close signals are classified into same bins and the integral area is determined from the included signals. This avoids including areas lacking detected signals, and produces integration areas which more closely match the present signals compared to equidistant binning. It is also usable in 2D spectra, for which equidistant binning becomes impractical, at least without filtering bins actually containing meaningful signals. For comparison, equidistant binning with 700 regions in the interval of 0.5 - 9.0 ppm was also performed.

While the TSP-d4 acted as internal standard with constant concentration compared to plant material, probabilistic quotient normalization [57] implemented in ImatraNMR was used to generate alternative data sets which does not rely on TSP-d4 concentration.

## 2.6. Statistical analysis

The bin integral files produced by ImatraNMR were loaded easily into the R statistical package [60], in which several PCAs (Principal Component Analysis) were performed for the different sample sets [61]. PCA is a statistical method which decomposes the data into *principal components* of decreasing importance, each one describing part of the variance between samples. The meaning of the components can be interpreted from the the component loading coefficients, which correspond to integral areas and subsequently chemical shifts of distinct metabolites. The highest loads and their bin numbers were extracted from the results and plotted with SimpeleNMR *simp\_view.py* to visualize the related signals.

At later stage basic PCA and the related PLS/PLS-DA analysis tools were incorporated to SimpeleNMR using Scikit-learn [56, 62] (*simp\_mvar.py*), and the analysis was duplicated. In addition, PLS analyses were conducted for the ozone treatment samples (Set 2) using the exposure time as a response variable.

## 2.7. Metabolite assignment

Most of the metabolites were assigned with BMRB and SDBS databases [11, 63], previous literature concerning similar samples [64, 65, 66] and HSQC, HMBC and COSY/TOCSY obtained from select samples. Epithionitriles and iberin nitrile were not found in the databases, and were simulated by ACD/NMR Predictors 2012 software to obtain reference spectra. A spectrum of C5 epithionitrile was obtained from Koichiro Shimomura [66], but it was also decided to synthesize it as a reference compound, as it was a central differentiator (Figure 1). The synthesis presented in supplementary material. During the assignment process, SimpeleNMR viewer *simp\_view.py* was used to overlay spectra, and correlation group tool (*simp\_corr.py*) was used to search for bins whose intensity is collinear with a bin of interest. This is not direct evidence, but can give hints which signals are related even without correlations in 2D spectra, similarly to STOCSY [67].

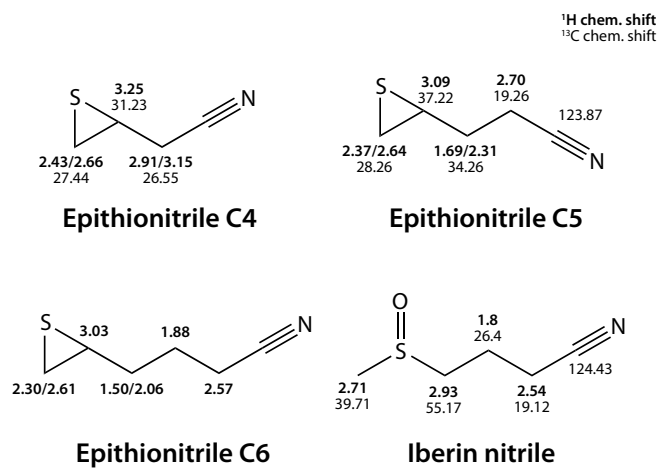

Figure 1: The structure and chemical shift assignments for epithionitriles and iberin nitrile. The iberin nitrile assignments are from a plant extract sample.



### 3. Results and discussion

#### 3.1. Separation of plant lines (set 1A and 1B)

The initial sample set included four biological replicates of four different plant lines, however the repetitions were grown in two different time periods, yielding sample sets 1A and 1B. This is reflected in the PCA results (Figure 2), where the first principal component (PC1) separates the sample sets, while the second (PC2) separates the plant lines. The difference between sample sets seems to be related to citric acid cycle, which apparently is more active in 1A. To emphasize the metabolic differences between plant lines, PCA can be performed separately for only 1A or 1B. This approach can be seen in the lower PCA plot, in which the PC1 separates the plant lines already, while PC2 separates the Col-0 and Col-s species further.

The main difference between Col-0 and Cvi-0 samples is the C4/C5 epithionitrile and iberin nitrile concentration (Figure 1), which appears to be the characteristic and easily detected distinction, even just by comparing the spectra visually (Figure 3). Differences between Col-0 and Col-s seem to be related to sinapic acid, methanol and citric acid cycle. The C5 epithionitrile and iberin nitrile seem to be result of alternate pathways, and mostly one size was found to be present (Figure 3).

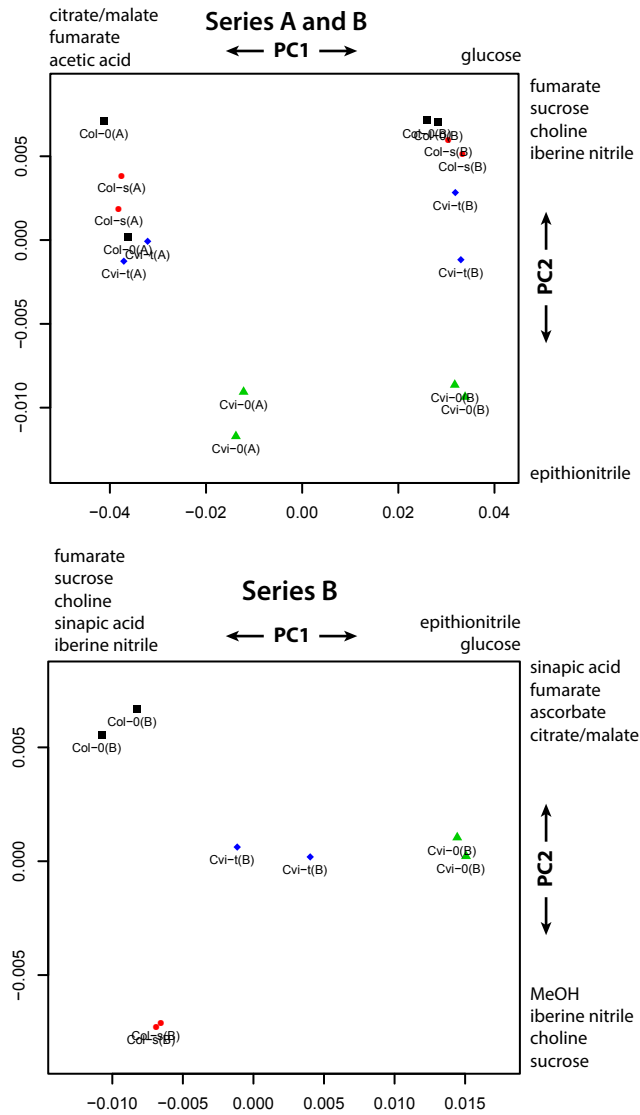

Figure 2: The basic PCA analysis of the four different plant lines, including sample sets 1A and 1B (top), and only 1B (bottom). The growing period can be separated easily (top) while plant lines are separated nicely when analyzing each set individually. All data presented is regular  $^1\text{H}$  spectra with ImatraNMR histogram binning and PQ normalization.

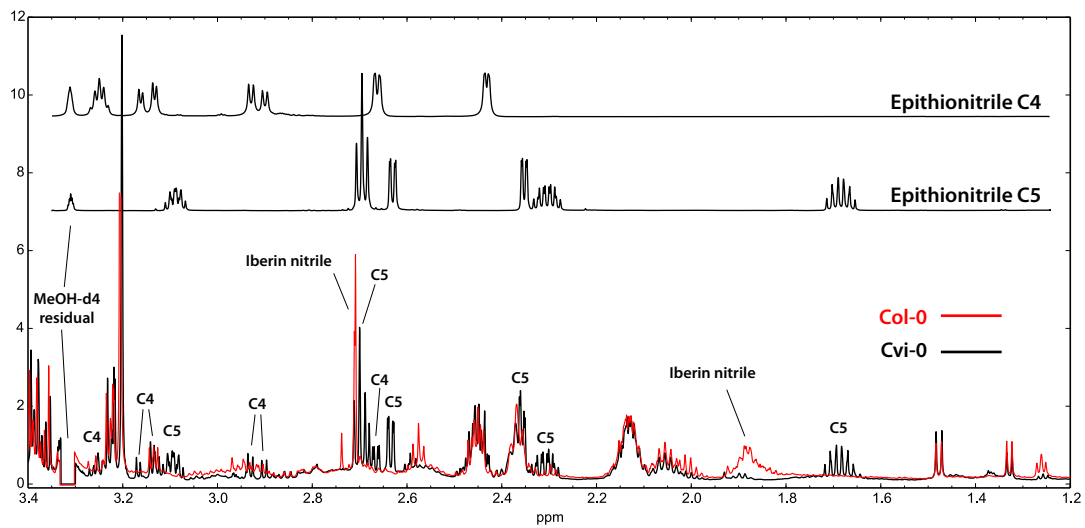

Figure 3: The dissimilarity of Col-0 and Cvi-0 samples can be seen easily by comparison of the <sup>1</sup>H spectra, as epithionitriles and iberin nitrile have several characteristic signals. Especially the C5 epithionitrile signal at ~1.7 ppm is easy to observe.

### 3.2. Ozone treatment (set 2)

The Cvi-0, Col-0 and Col-s strains exposed to ozone for 0, 20, 40, 60 and 120 minutes were analysed with both regular  $^1\text{H}$  NMR spectra and JRES spectra, as more subtle differences were expected. The resulting PCA analysis obtained from JRES is presented in Figure 4. Unsurprisingly, the first component separates Col-0 and Cvi-0 strains with similar metabolites as in the first analysis, but PC2 is clearly related to ozone exposure. Short ozone exposure seems to be related with (small) positive score and long exposure with negative score on PC2. The negative PC2 loadings are associated with GABA (Gamma-Aminobutyric acid) and various amino acids, and the GABA concentration indeed rises sharply in 120 min samples in both strains showing visible cell death in that time point (Cvi-0 and Col-s), but not in ozone tolerant Col-0 (Figure 5). This is clearly reflected in the PCA results, where 120 min samples of Col-s and Cvi-0 have much higher negative score on PC2. The rise in the GABA levels coinciding with ozone-induced cell death was an intriguing finding, since Arabidopsis gene GAD4 (AT2G02010), one of the five glutamate decarboxylases catalysing the final step in GABA biosynthesis, has been reported to be one of the most highly ozone-induced transcripts [68]. This implies that GABA might play a significant role during ozone-induced programmed cell death.

In this analysis, the impact of using PQ normalization (as opposed to TSP-d4 internal standard) and ImatraNMR histogram binning (as opposed to equidistant binning) can be demonstrated. As seen in Figure 4, using only histogram binning or equidistant binning with PQ normalization produce inferior results when compared with combined use of both histogram binning and PQ normalization. Histogram binning alone produces similar results to equidistant binning, but works much better in conjunction with PQ normalization, showing clear separation of 120 min samples. Similar results could be achieved with PLS analysis of the same JRES data, but it also revealed the somewhat rising MeOH concentration corresponding to ozone exposure time (non-deuterated MeOH can be separated from the solvent residue due to slight difference in chemical shift). PCA analysis of regular  $^1\text{H}$  derived data also produced similar results, while the improvement provided by histogram binning and PQ normalization was milder. Additional plots can be found in supplementary material.

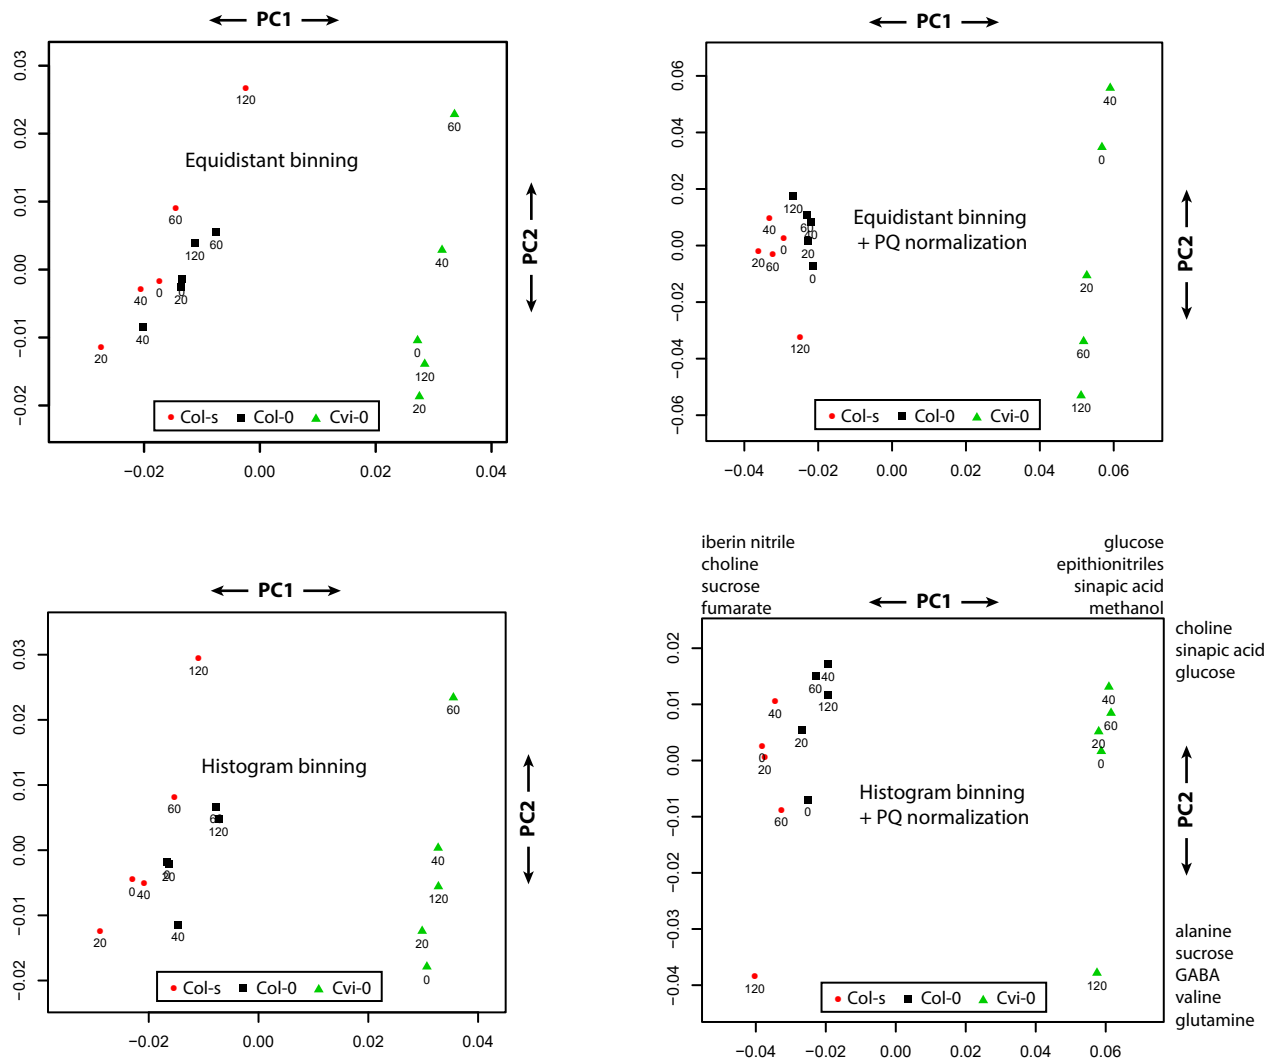

Figure 4: The PCA created from 1D JRES of ozone treated samples, with the exposure time noted in label. Ozone tolerant Col-0 species (black square) can be differentiated easily. The "histogram binning" combined with PQ normalization clearly produces best separation.

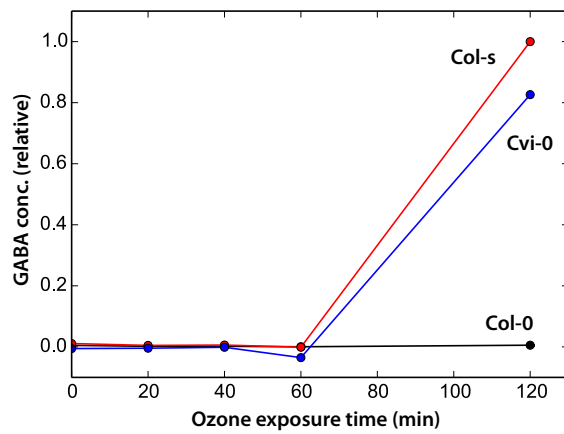

Figure 5: The relative concentration of GABA during ozone exposure (3.01 ppm CH<sub>2</sub>, JRES). The concentration is effectively below detection limit until 60 min, after which it is observed only in the ozone sensitive lines Cvi-0 and Col-s.

### 3.3. Sample stability

305 Obtaining repetitive quantitative  $^1\text{H}$  spectra for extensive period of time produces a data set which ImatraNMR and SimpeleNMR are well suited: a large number of similar and complex spectra, which must be processed identically and examined.

The two samples were analyzed with PCA similarly as the sample sets 1A/1B and 2, producing a quite interesting plot (Figure 6). The spectra is separated nicely by time by PC1, while PC2 contains much smaller scores. From the the corresponding metabolites 310 of PC1, it can be clearly seen that sucrose and ascorbic acid are decomposing, which can be confirmed easily by looking the spectra and integrals directly (Figure 6). The increase of glucose and fructose are also in line with this observation, suggesting slow hydrolysis of sucrose, and the reaction seems also approximately follow first order kinetics, with a half life of 25.5 hours. Other metabolites seem to be stable, and even the unstable 315 metabolites seem to have half-life of more than >20 h, making the decomposition during the acquisition time relatively small.

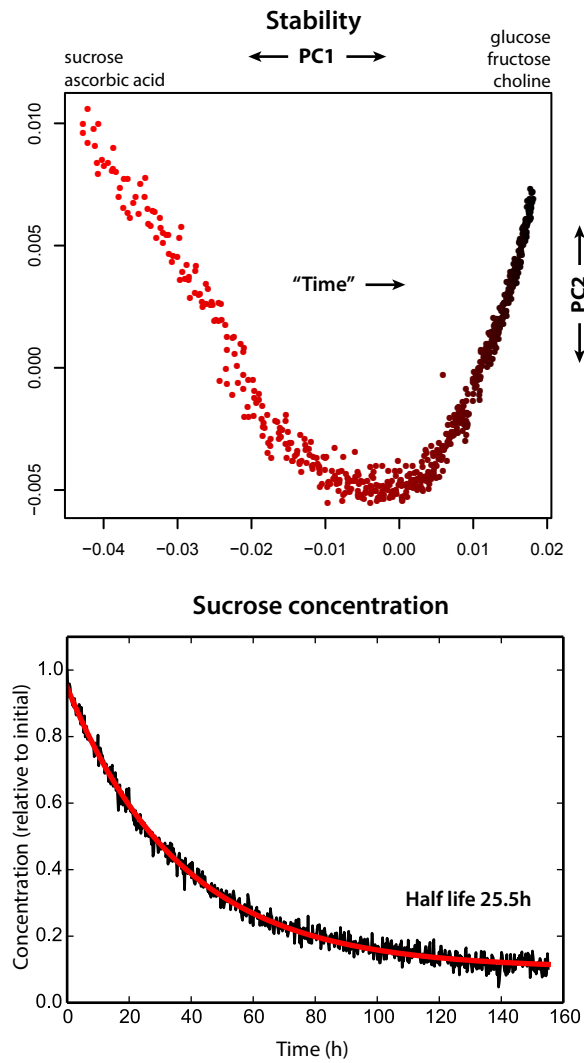

Figure 6: Stability analysis of RIL sample 472 using PCA. Time is represented by color, going from light red to black in 874 second intervals. The "time" marked in the plot is not an actual axis, but the PC1 seems to separate the samples very well according to elapsed time.



#### 4. Conclusions

ImatraNMR and SimpeleNMR are free tools for quantitative NMR analysis, which can be used for efficient processing of quantitative NMR spectra. Using these tools, 320 analyzes of both  $^1\text{H}$  and JRES spectra acquired from different lines of *Arabidopsis thaliana* extracts were demonstrated. The results indicate that a combination of JRES spectra, histogram binning (ImatraNMR) and PQ normalization seems to produce suitable data for statistical analysis, yielding superior results compared to basic 1D  $^1\text{H}$  spectra and equidistant binning. This is in line with previous work [69, 58]. JRES spectra seems to 325 work providing more resolution in  $^1\text{H}$  spectra, with the drawback of strong dependence of transverse relaxation rate due to the employed apodization. Relative concentration differences can be observed, but changing field strength, solution viscosity or any other factor affecting  $T_2$  relaxation rate can alter the measured values.

Several metabolite differences could be identified with multivariate statistical analysis. 330 Especially epithionitriles and iberin nitrile concentration were shown to differ in the main plant lines. In addition, changes during oxidative stress (ozone exposure) were detected, with GABA found as a clear marker for ozone incurred damage. Sample stability was also examined by measuring repetitive  $^1\text{H}$  spectra for extended period of time, with some unstable metabolites found (sucrose, ascorbic acid). These compounds are still 335 sufficiently stable for quantitative analysis, provided that the measurements are done within few hours after sample preparation.

#### 5. Acknowledgments

The authors thank Dr. Kirk Marat for correspondence while writing Bruker file handling in SimpeleNMR and Dr. Wolfgang Bermel from Bruker BioSpin for provid- 340 ing insight on implementation details. Dr. Koichiro Shimomura is acknowledged for providing NMR spectrum of C5 epithionitrile. Funding was provided by the Academy of Finland (grants: 135751, 140981, and 273132 to M.B. and the Academy of Finland Center of Excellence in Primary Producers 2014–2019). V.M. and J.H. are members of the doctoral programme in chemistry and molecular sciences (CHEMS), while L.V. is a 345 member of the Integrative Life Science Doctoral Program (ILS).

#### References

- [1] K. Krishnamurthy, Craft (complete reduction to amplitude frequency table) – robust and time-efficient bayesian approach for quantitative mixture analysis by nmr, *Magnetic Resonance in Chemistry* 51 (12) (2013) 821–829.
- 350 [2] M. A. Bernstein, S. Sýkora, C. Peng, A. Barba, C. Cobas, Optimization and automation of quantitative NMR data extraction, *Analytical Chemistry* 85 (12) (2013) 5778–5786.
- [3] A. M. Weljie, J. Newton, P. Mercier, E. Carlson, C. M. Slupsky, Targeted profiling: quantitative analysis of  $^1\text{H}$  NMR metabolomics data, *Analytical Chemistry* 78 (13) (2006) 4430–4442.
- 355 [4] P. Mercier, M. Lewis, D. Chang, D. Baker, D. Wishart, Towards automatic metabolomic profiling of high-resolution one-dimensional proton NMR spectra, *Journal of Biomolecular NMR* 49 (3-4) (2011) 307–323.
- [5] I. A. Lewis, S. C. Schommer, J. L. Markley, rNMR: open source software for identifying and quantifying metabolites in NMR spectra, *Magnetic Resonance in Chemistry* 47 (S1) (2009) S123–S126.
- 360 [6] J. Hao, W. Astle, M. De Iorio, T. Ebbels, Batman—an r package for the automated quantification of metabolites from NMR spectra using a bayesian model, *Bioinformatics*.

- [7] J. Hao, M. Liebecke, W. Astle, M. De Iorio, J. G. Bundy, T. M. Ebbels, Bayesian deconvolution and quantification of metabolites in complex 1D NMR spectra using BATMAN, *Nature protocols* 9 (6) (2014) 1416–1427.
- 365 [8] M. A. Fitzpatrick, C. M. McGrath, S. P. Young, Pathomx: an interactive workflow-based tool for the analysis of metabolomic data, *BMC bioinformatics* 15 (1) (2014) 396.
- [9] J. Xia, T. Bjorndahl, P. Tang, D. Wishart, MetaboMiner - semi-automated identification of metabolites from 2d NMR spectra of complex biofluids, *BMC Bioinformatics* 9 (1) (2008) 507.
- 370 [10] C. Ludwig, U. Gunther, MetaboLab - advanced NMR data processing and analysis for metabolomics, *BMC Bioinformatics* 12 (1) (2011) 366.
- [11] E. L. Ulrich, H. Akutsu, J. F. Doreleijers, Y. Harano, Y. E. Ioannidis, J. Lin, M. Livny, S. Mading, D. Maziuk, Z. Miller, E. Nakatani, C. F. Schulte, D. E. Tolmie, R. Kent Wenger, H. Yao, J. L. Markley, BioMagResBank, *Nucleic Acids Research* 36 (suppl 1) (2008) D402–D408.
- 375 [12] D. S. Wishart, C. Knox, A. C. Guo, R. Eisner, N. Young, B. Gautam, D. D. Hau, N. Psychogios, E. Dong, S. Bouatra, R. Mandal, I. Sinelnikov, J. Xia, L. Jia, J. A. Cruz, E. Lim, C. A. Sobsey, S. Shrivastava, P. Huang, P. Liu, L. Fang, J. Peng, R. Fradette, D. Cheng, D. Tzur, M. Clements, A. Lewis, A. De Souza, A. Zuniga, M. Dawe, Y. Xiong, D. Clive, R. Greiner, A. Nazzyrova, R. Shaykhtudinov, L. Li, H. J. Vogel, I. Forsythe, HMDB: a knowledgebase for the human metabolome, *Nucleic Acids Research* 37 (suppl 1) (2009) D603–D610.
- 380 [13] S. Ravanbakhsh, P. Liu, T. C. Bjordahl, R. Mandal, J. R. Grant, M. Wilson, R. Eisner, I. Sinelnikov, X. Hu, C. Luchinat, R. Greiner, D. S. Wishart, Accurate, fully-automated NMR spectral profiling for metabolomics, *PLoS ONE* 10 (5) (2015) e0124219.
- [14] J. Xia, I. V. Sinelnikov, B. Han, D. S. Wishart, MetaboAnalyst 3.0 — making metabolomics more meaningful, *Nucleic Acids Research*.
- 385 [15] F. Delaglio, S. Grzesiek, G. Vuister, G. Zhu, J. Pfeifer, A. Bax, NMRPipe: A multidimensional spectral processing system based on UNIX pipes, *Journal of Biomolecular NMR* 6 (3) (1995) 277–293.
- [16] J. J. Helmus, C. P. Jaroniec, NmrGlue: an open source python package for the analysis of multidimensional NMR data, *Journal of Biomolecular NMR* 55 (4) (2013) 355–367.
- 390 [17] V. Mäkelä, P. Karhunen, S. Siren, S. Heikkinen, I. Kilpeläinen, Automating the {NMR} analysis of base oils: Finding naphthene signals, *Fuel* 111 (0) (2013) 543 – 554.
- [18] S. Meier, N. Solodovnikova, P. R. Jensen, J. Wendland, Sulfite action in glycolytic inhibition: In vivo real-time observation by hyperpolarized  $^{13}\text{C}$  nmr spectroscopy, *ChemBioChem* 13 (15) (2012) 2265–2269.
- 395 [19] J. Aguilar, S. Faulkner, M. Nilsson, G. Morris, Pure shift 1h nmr: A resolution of the resolution problem?, *Angewandte Chemie International Edition* 49 (23) (2010) 3901–3903.
- [20] N. H. Meyer, K. Zangger, Simplifying proton nmr spectra by instant homonuclear broadband decoupling, *Angewandte Chemie International Edition* 52 (28) (2013) 7143–7146.
- [21] K. Zangger, Pure shift NMR, *Progress in Nuclear Magnetic Resonance Spectroscopy* 86–87 (0) (2015) 1 – 20.
- 400 [22] W. P. Aue, J. Karhan, R. R. Ernst, Homonuclear broad-band decoupling and 2-dimensional j-resolved nmr spectroscopy, *J. Chem. Phys.* 64 (1976) 4226.
- [23] J.-M. Nuzillard, Time-reversal of NMR signals by linear prediction. application to phase-sensitive homonuclear J-resolved spectroscopy, *Journal of Magnetic Resonance, Series A* 118 (1) (1996) 132–135.
- 405 [24] A. Martinez, F. Bourdreaux, E. Riguet, J.-M. Nuzillard, High-resolution and high-sensitivity 2D homonuclear j-resolved NMR spectroscopy, *Magnetic Resonance in Chemistry* 50 (1) (2012) 28–32.
- [25] P. Sakhaei, W. Bermel, Improving the sensitivity of conventional spin echo spectra by preservation of initial signal-to-noise ratio, *Journal of Magnetic Resonance* 242 (2014) 220–223.
- 410 [26] P. Mutzenhardt, F. Guenneau, D. Canet, A procedure for obtaining pure absorption 2D J-Spectra: Application to quantitative fully j-decoupled homonuclear NMR spectra, *Journal of Magnetic Resonance* 141 (2) (1999) 312 – 321.
- [27] V. A. Mandelshtam, N. D. Taylor, H. Hu, M. Smith, A. Shaka, Highly resolved double absorption 2D NMR spectra from complex severely truncated 2D phase-modulated signals by filter-diagonalization-averaging method, *Chemical Physics Letters* 305 (3–4) (1999) 209 – 216.
- 415 [28] A. J. Pell, J. Keeler, Two-dimensional j-spectra with absorption-mode lineshapes, *Journal of Magnetic Resonance* 189 (2) (2007) 293 – 299.
- [29] A. Mäkelä, I. Kilpeläinen, S. Heikkinen, Quantitative  $^{13}\text{C}$  NMR spectroscopy using refocused constant-time INEPT, Q-INEPT-CT, *J. Magn. Reson.* 204 (2010) 124–130.
- 420 [30] V. Manu, A. Kumar, Fast and accurate quantification using genetic algorithm optimized  $^1\text{H}$ - $^{13}\text{C}$

- refocused constant-time INEPT, *Journal of Magnetic Resonance* 234 (0) (2013) 106 – 111.
- [31] T. J. Henderson, Sensitivity-enhanced quantitative  $^{13}\text{C}$  NMR spectroscopy via cancellation of  $^1\text{J}_{\text{CH}}$  dependence in DEPT polarization transfers, *J. Am. Chem. Soc.* 126 (2004) 3682–3683.
- [32] B. Jiang, N. Xiao, H. Liu, Z. Zhou, X.-a. Mao, M. Liu, Optimized quantitative dept and quantitative pommie experiments for 13c nmr, *Analytical Chemistry* 80 (21) (2008) 8293–8298, pMID: 18841996.
- [33] H. Koskela, I. Kilpeläinen, S. Heikkinen, Some aspects of quantitative 2D NMR, *J. Magn. Reson.* 174 (2005) 237–244.
- [34] D. J. Peterson, N. M. Loening, Qq-hsqc: a quick, quantitative heteronuclear correlation experiment for nmr spectroscopy, *Magnetic Resonance in Chemistry* 45 (11) (2007) 937–941.
- [35] K. Hu, W. M. Westler, J. L. Markley, Simultaneous quantification and identification of individual chemicals in metabolite mixtures by two-dimensional extrapolated time-zero 1h–13c hsqc (hsqc0), *Journal of the American Chemical Society* 133 (6) (2011) 1662–1665, pMID: 21247157.
- [36] D. Hoult, C.-N. Chen, H. Eden, M. Eden, Elimination of baseline artifacts in spectra and their integrals, *Journal of Magnetic Resonance* (1969) 51 (1) (1983) 110 – 117.
- [37] R. Kyburz, What happens after the last pulse?, *Magnetic Moments VII.1* Spring.
- [38] C. Tang, An analysis of baseline distortion and offset in NMR spectra, *Journal of Magnetic Resonance, Series A* 109 (2) (1994) 232 – 240.
- [39] G. Wider, Elimination of baseline artifacts in NMR spectra by oversampling, *Journal of Magnetic Resonance* (1969) 89 (2) (1990) 406 – 409.
- [40] D. Moskau, Application of real time digital filters in NMR spectroscopy, *Concepts in Magnetic Resonance* 15 (2) (2002) 164–176.
- [41] Agilent Technologies, Agilent DirectDrive Datasheet (2013).
- [42] D. Marion, A. Bax, Baseline correction of 2d FT NMR spectra using a simple linear prediction extrapolation of the time-domain data, *Journal of Magnetic Resonance* (1969) 83 (1) (1989) 205 – 211.
- [43] Topspin Acquisition, Commands and Parameters, Bruker BioSpin GmbH, 2010, topspin 3.0.
- [44] H. de Brouwer, Evaluation of algorithms for automated phase correction of NMR spectra, *Journal of Magnetic Resonance* 201 (2) (2009) 230–238.
- [45] Q. Bao, J. Feng, L. Chen, F. Chen, Z. Liu, B. Jiang, C. Liu, A robust automatic phase correction method for signal dense spectra, *Journal of Magnetic Resonance* 234 (0) (2013) 82 – 89.
- [46] P. Soininen, J. Haarala, J. Vepsäläinen, M. Niemitz, R. Laatikainen, Strategies for organic impurity quantification by  $^1\text{H}$  NMR spectroscopy: Constrained total-line-shape fitting, *Analytica Chimica Acta* 542 (2) (2005) 178 – 185.
- [47] W. Astle, M. De Iorio, S. Richardson, D. Stephens, T. Ebbels, A bayesian model of NMR spectra for the deconvolution and quantification of metabolites in complex biological mixtures, *Journal of the American Statistical Association* 107 (500) (2012) 1259–1271.
- [48] A. Vehtari, V.-P. Mäkinen, P. Soininen, P. Ingman, S. Mäkelä, M. Savolainen, M. Hannuksela, K. Kaski, M. Ala-Korpela, A novel bayesian approach to quantify clinical variables and to determine their spectroscopic counterparts in  $^1\text{H}$  nmr metabonomic data, *BMC Bioinformatics* 8 (Suppl 2) (2007) S8.
- [49] P. Soininen, A. J. Kangas, P. Wurtz, T. Tukiainen, T. Tynkkynen, R. Laatikainen, M.-R. Jarvelin, M. Kahonen, T. Lehtimäki, J. Viikari, O. T. Raitakari, M. J. Savolainen, M. Ala-Korpela, High-throughput serum NMR metabonomics for cost-effective holistic studies on systemic metabolism, *Analyst* 134 (2009) 1781–1785.
- [50] T. De Meyer, D. Sinnaeve, B. Van Gasse, E. Tsiorkova, E. R. Rietzschel, M. L. De Buyzere, T. C. Gillebert, S. Bekaert, J. C. Martins, W. Van Criekinge, Nmr-based characterization of metabolic alterations in hypertension using an adaptive, intelligent binning algorithm, *Analytical Chemistry* 80 (10) (2008) 3783–3790.
- [51] P. Anderson, D. Mahle, T. Doom, N. Reo, N. DelRaso, M. Raymer, Dynamic adaptive binning: an improved quantification technique for NMR spectroscopic data, *Metabolomics* 7 (2) (2011) 179–190.
- [52] S. Sousa, A. Magalhães, M. M. C. Ferreira, Optimized bucketing for NMR spectra: Three case studies, *Chemometrics and Intelligent Laboratory Systems* 122 (0) (2013) 93 – 102.
- [53] C. Ludwig, M. R. Viant, Two-dimensional j-resolved nmr spectroscopy: review of a key methodology in the metabolomics toolbox, *Phytochemical Analysis* 21 (1) (2010) 22–32.
- [54] P. Giraudeau, N. Guignard, E. Hillion, E. Baguet, S. Akoka, Optimization of homonuclear 2d NMR for fast quantitative analysis: Application to tropine–nortropine mixtures, *Journal of Pharmaceutical and Biomedical Analysis* 43 (4) (2007) 1243 – 1248.
- [55] H. M. Parsons, C. Ludwig, M. R. Viant, Line-shape analysis of j-resolved nmr spectra: application to metabolomics and quantification of intensity errors from signal processing and high signal

- 480 congestion, *Magnetic Resonance in Chemistry* 47 (S1) (2009) S86–S95.
- [56] F. Pedregosa, G. Varoquaux, A. Gramfort, V. Michel, B. Thirion, O. Grisel, M. Blondel, P. Prettenhofer, R. Weiss, V. Dubourg, J. Vanderplas, A. Passos, D. Cournapeau, M. Brucher, M. Perrot, E. Duchesnay, Scikit-learn: Machine learning in Python, *Journal of Machine Learning Research* 12 (2011) 2825–2830.
- 485 [57] F. Dieterle, A. Ross, G. Schlotterbeck, H. Senn, Probabilistic quotient normalization as robust method to account for dilution of complex biological mixtures. application in 1h nmr metabonomics, *Analytical Chemistry* 78 (13) (2006) 4281–4290, pMID: 16808434.
- [58] J. L. Ward, C. Harris, J. Lewis, M. H. Beale, Assessment of 1h {NMR} spectroscopy and multivariate analysis as a technique for metabolite fingerprinting of *arabidopsis thaliana*, *Phytochemistry* 62 (6) (2003) 949 – 957, *plant Metabolomics*.
- 490 [59] H. K. Kim, Y. H. Choi, R. Verpoorte, NMR-based metabolomic analysis of plants, *Nat. Protocols* 5 (3) (2010) 536–549.
- [60] R Development Core Team, R: A Language and Environment for Statistical Computing, R Foundation for Statistical Computing, Vienna, Austria, ISBN 3-900051-07-0 (2008).
- 495 URL <http://www.R-project.org>
- [61] J. E. Jackson, A User's Guide to Principal Components, John Wiley and Sons, 1991.
- [62] S. Wold, M. Sjöström, L. Eriksson, PLS-regression: a basic tool of chemometrics, *Chemometrics and Intelligent Laboratory Systems* 58 (2) (2001) 109 – 130.
- [63] SDBSWeb (National Institute of Advanced Industrial Science and Technology).
- 500 URL <http://sdb.sriodb.aist.go.jp>
- [64] M. Gromova, C. Roby, Toward *arabidopsis thaliana* hydrophilic metabolome: assessment of extraction methods and quantitative 1h nmr, *Physiologia Plantarum* 140 (2) (2010) 111–127.
- [65] A. M. Kore, G. F. Spencer, M. A. Wallig, Purification of the omega-(methylsulfinyl) alkyl glucosinolate hydrolysis products: 1-isothiocyanato-3-(methylsulfinyl) propane, 1-isothiocyanato-4-(methylsulfinyl) butane, 4-(methylsulfinyl) butanenitrile, and 5-(methylsulfinyl) pentanenitrile from broccoli and *lesquerella fendleri*, *Journal of Agricultural and Food Chemistry* 41 (1) (1993) 89–95.
- 505 [66] M. Kato, Y. Imayoshi, H. Iwabuchi, K. Shimomura, Kinetic changes in glucosinolate-derived volatiles by heat-treatment and myrosinase activity in *nakajimana* (*brassica rapa* l. cv. *nakajimana*), *Journal of agricultural and food chemistry* 59 (20) (2011) 11034–11039.
- 510 [67] O. Cloarec, M.-E. Dumas, A. Craig, R. H. Barton, J. Trygg, J. Hudson, C. Blancher, D. Gauguier, J. C. Lindon, E. Holmes, J. Nicholson, Statistical total correlation spectroscopy: an exploratory approach for latent biomarker identification from metabolic 1h nmr data sets, *Analytical Chemistry* 77 (5) (2005) 1282–1289, pMID: 15732908.
- [68] E. Xu, L. Vaahtera, M. Brosché, Roles of defense hormones in the regulation of ozone-induced changes in gene expression and cell death, *Molecular Plant* doi:<http://dx.doi.org/10.1016/j.molp.2015.08.008>.
- 515 [69] T. De Meyer, D. Sinnaeve, B. Van Gasse, E.-R. Rietzschel, M. De Buyzere, M. Langlois, S. Bekaert, J. Martins, W. Van Criekinge, Evaluation of standard and advanced preprocessing methods for the univariate analysis of blood serum <sup>1</sup>H-nmr spectra, *Analytical and Bioanalytical Chemistry* 398 (4) (2010) 1781–1790.
- 520
